# Supplementary material for: High-performance carbon molecular sieve membranes for hydrogen purification and pervaporation dehydration of organic solvents
Source: Royal Society of Chemistry journal article supplement (doi:10.1039/c8ta09504c), 2019-01-01
Supplement: c8ta09504c1.pdf [file c8ta09504c1.pdf]

## Supporting information

### High-performance carbon molecular sieve membranes for gas separation and solvents dewatering by pervaporation

P. H. Tchoua Ngamou\*<sup>a,b</sup>, M. E. Ivanova <sup>a,b</sup>, O. Guillon <sup>a,b</sup> and W.A. Meulenber <sup>a,b,c</sup>

<sup>a</sup>*Forschungszentrum Jülich GmbH, Institute of Energy and Climate Research, Materials Synthesis and Processing (IEK-1), D-52425 Jülich, Germany.*

<sup>b</sup>*Jülich Aachen Research Alliance: JARA-Energy, Forschungszentrum Jülich GmbH, D-52425 Jülich, Germany.*

<sup>c</sup>*Inorganic Membranes, Faculty of Science and Technology, University of Twente, P. O. Box 217, 7500 AE Enschede, The Netherlands.*

\*Email - [p.tchoua@fz-juelich.de](mailto:p.tchoua@fz-juelich.de)

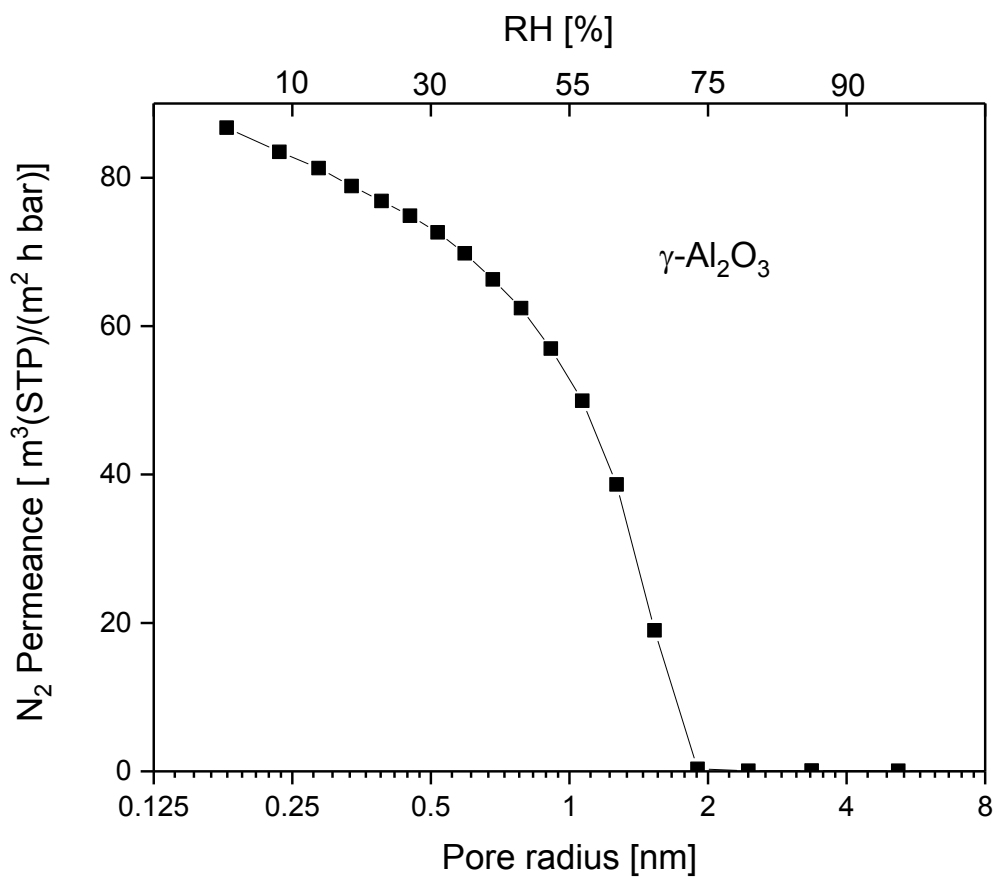

**Fig. S1** N<sub>2</sub>- permeance from permoporosimetry measurements with N<sub>2</sub>/H<sub>2</sub>O on a tubular  $\alpha$ -Al<sub>2</sub>O<sub>3</sub>- support coated with two  $\gamma$ -Al<sub>2</sub>O<sub>3</sub> layers.

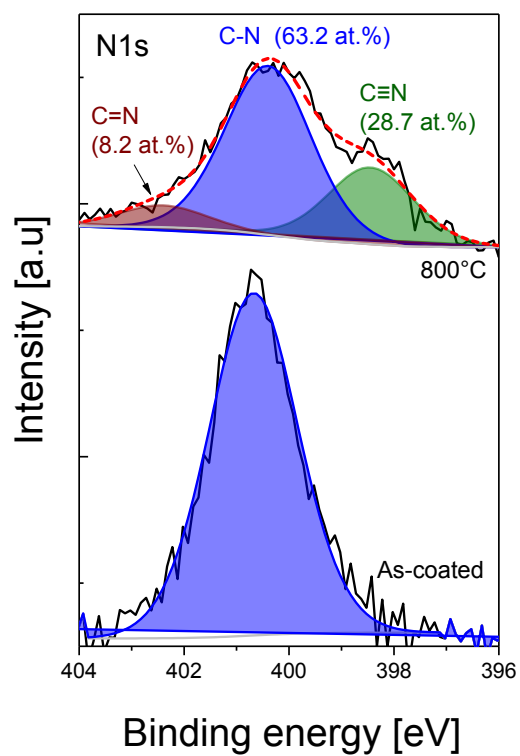

**Fig. S2** N1s XPS spectra of the  $\alpha$ -Al<sub>2</sub>O<sub>3</sub>/ $\gamma$ -Al<sub>2</sub>O<sub>3</sub>-supported polyimide membrane before (bottom graph) and after (top graph) the heat treatment at 700°C.

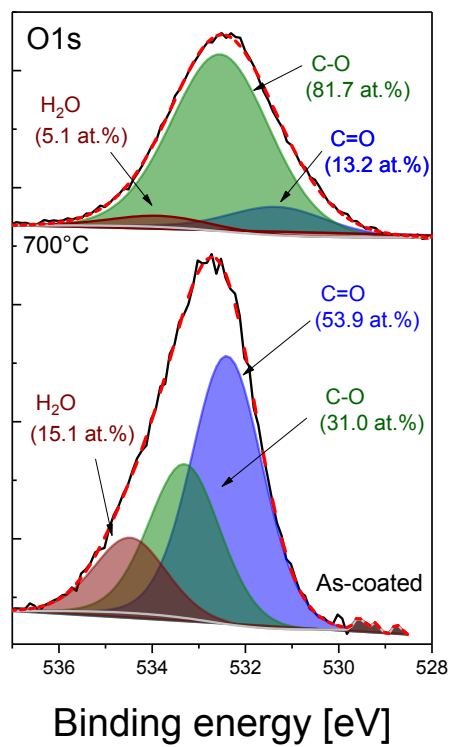

**Fig. S3** O1s XPS spectra of the  $\alpha$ -Al<sub>2</sub>O<sub>3</sub>/ $\gamma$ -Al<sub>2</sub>O<sub>3</sub>-supported polyimide membrane prior (bottom graph) and after (top graph) pyrolysis at 700°C.

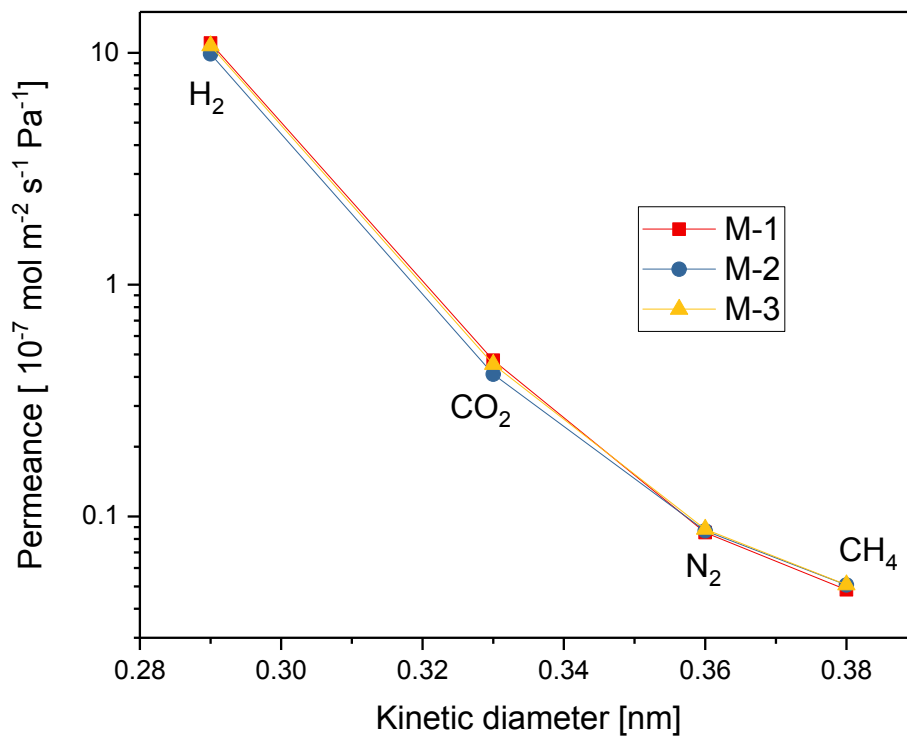

**Fig. S4** Single gas permeation through  $\alpha$ -Al<sub>2</sub>O<sub>3</sub> /  $\gamma$ -Al<sub>2</sub>O<sub>3</sub>-supported CMS membranes produced within one batch tested at 200°C with a feed pressure of 2bar. Gas permeances are measured for three samples with error less than 5 %.

**Table S1.** Permselectivities of the  $\alpha$ -Al<sub>2</sub>O<sub>3</sub> /  $\gamma$ -Al<sub>2</sub>O<sub>3</sub>-supported CMS membranes

| Permeance ratios                | M-1    | M-2    | M-3    | Knudsen selectivity |
|---------------------------------|--------|--------|--------|---------------------|
| H <sub>2</sub> /CO <sub>2</sub> | 23.30  | 24.06  | 23.65  | 4.67                |
| H <sub>2</sub> /N <sub>2</sub>  | 129.70 | 113.94 | 121.44 | 3.73                |
| H <sub>2</sub> /CH <sub>4</sub> | 227.74 | 195.06 | 211    | 2.8                 |

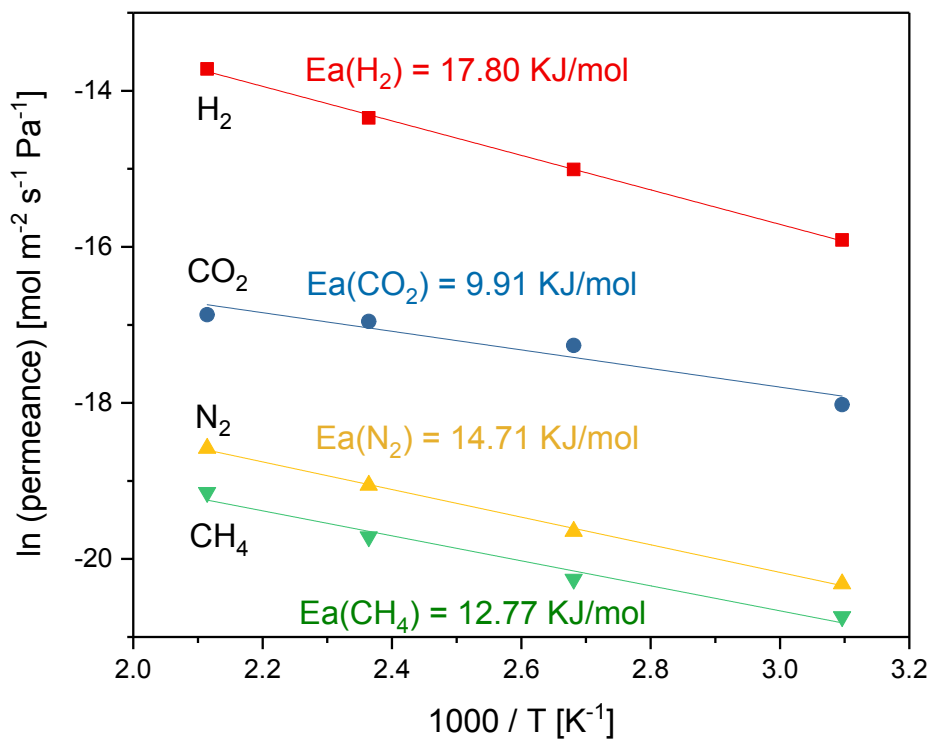

**Fig. S5** Arrhenius plots for the permeance of H<sub>2</sub>, CO<sub>2</sub>, N<sub>2</sub> and CH<sub>4</sub> through the  $\alpha$ -Al<sub>2</sub>O<sub>3</sub> /  $\gamma$ -Al<sub>2</sub>O<sub>3</sub> supported CMS membrane.
